# Supplementary material
Source: PubMed Central journal article supplement (PMC10234145)
Supplement: NIHMS1895195-supplement-1.pdf [file NIHMS1895195-supplement-1.pdf]

# Supplemental Figure 1 - MONARCH 2 study design

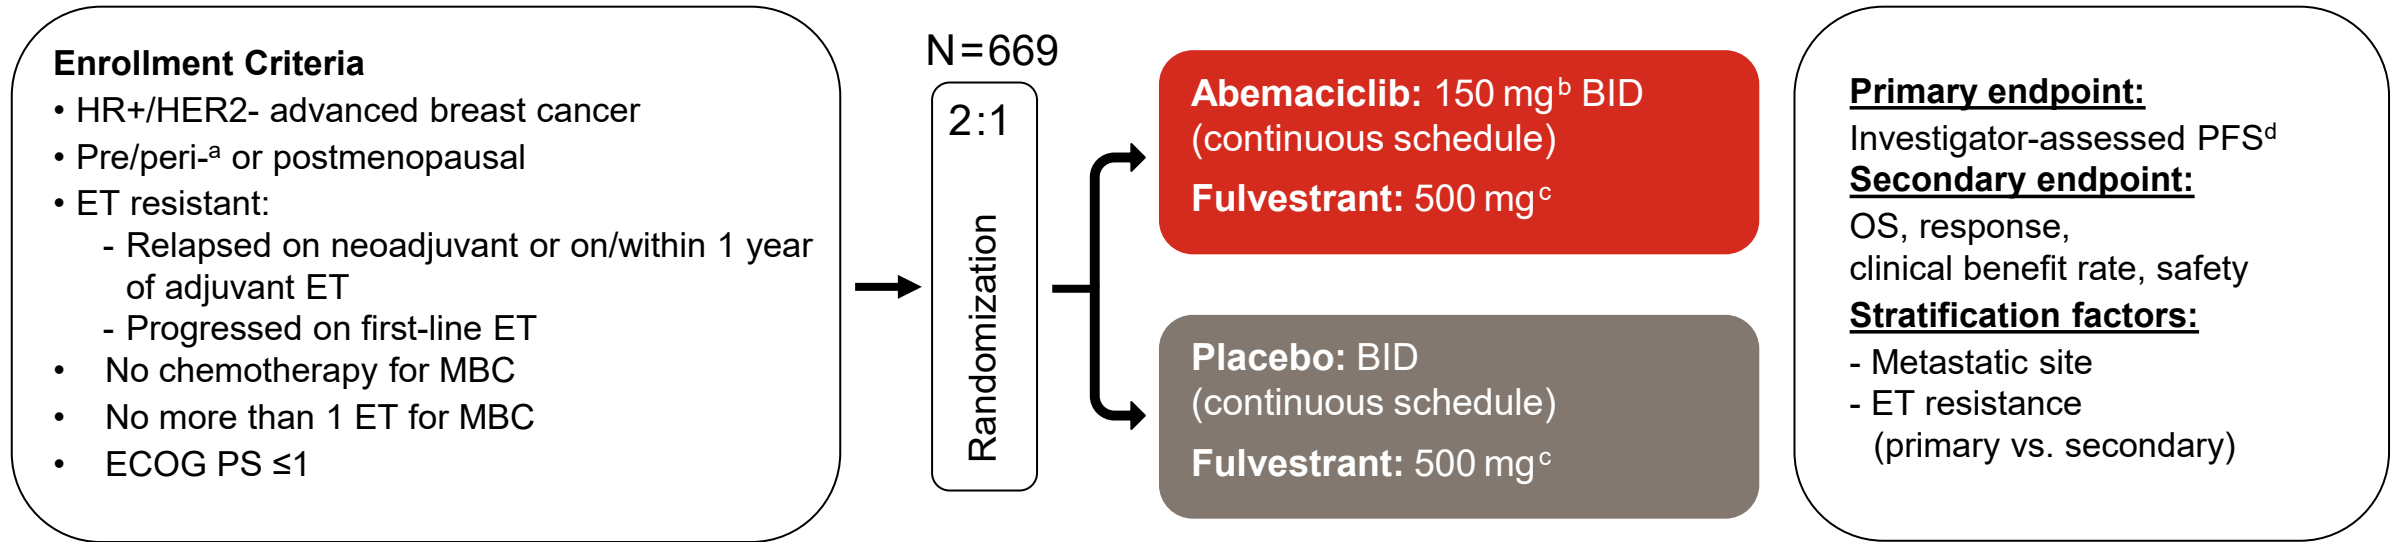

Abbreviations: BID = twice daily; ET = endocrine therapy; ECOG PS = Eastern Cooperative Oncology Group Performance Status; HR+ = hormone receptor positive; HER2- = human epidermal growth factor receptor 2 negative; MBC = metastatic breast cancer; N = number; OS = overall survival; PFS = progressive-free survival

<sup>a</sup> Required to receive gonadotropin-releasing hormone agonist

<sup>b</sup> Dose reduced by protocol amendment in all new and ongoing patients from 200 mg to 150 mg BID after 178 patients enrolled

<sup>c</sup> Fulvestrant administered per label

<sup>d</sup> Statistics: 378 events for 90% power at 1-sided  $\alpha$  of .025 assuming a true hazard ratio (HR) of .703

# Supplemental Figure 2 - Progression-Free Survival: ITT and TR populations

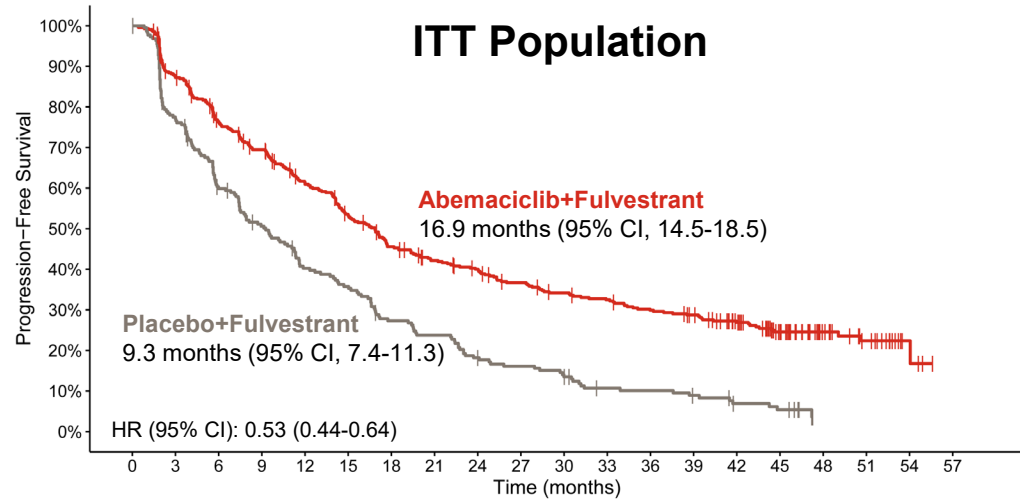

Number at risk

|     |     |     |     |     |     |     |     |     |     |     |     |     |    |    |    |    |    |   |   |
|-----|-----|-----|-----|-----|-----|-----|-----|-----|-----|-----|-----|-----|----|----|----|----|----|---|---|
| 446 | 365 | 312 | 280 | 242 | 208 | 176 | 158 | 147 | 132 | 121 | 114 | 104 | 97 | 78 | 53 | 28 | 18 | 4 | 0 |
| 223 | 165 | 124 | 103 | 81  | 72  | 54  | 47  | 36  | 31  | 26  | 18  | 17  | 14 | 9  | 7  | 0  | 0  | 0 | 0 |

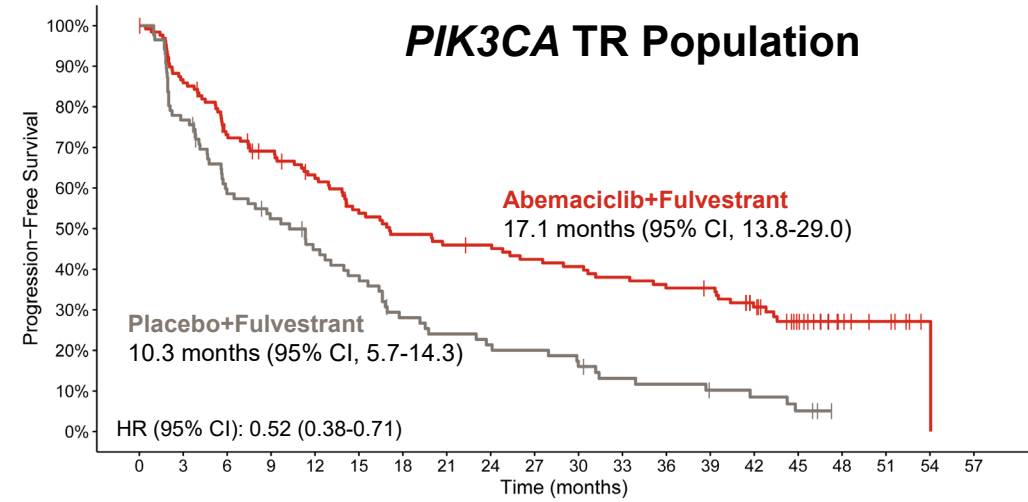

Number at risk

|     |     |    |    |    |    |    |    |    |    |    |    |    |    |    |    |   |   |   |   |
|-----|-----|----|----|----|----|----|----|----|----|----|----|----|----|----|----|---|---|---|---|
| 133 | 109 | 91 | 83 | 74 | 62 | 56 | 53 | 52 | 48 | 46 | 43 | 40 | 39 | 29 | 19 | 9 | 6 | 1 | 0 |
| 86  | 66  | 48 | 42 | 35 | 30 | 21 | 18 | 16 | 15 | 12 | 9  | 8  | 6  | 5  | 3  | 0 | 0 | 0 | 0 |

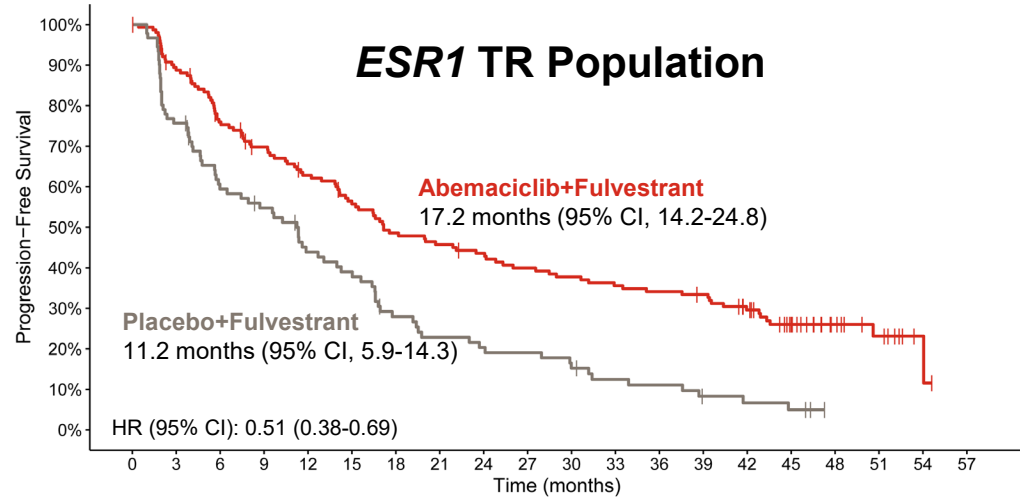

Number at risk

|     |     |     |     |    |    |    |    |    |    |    |    |    |    |    |    |    |   |   |   |
|-----|-----|-----|-----|----|----|----|----|----|----|----|----|----|----|----|----|----|---|---|---|
| 157 | 133 | 112 | 100 | 89 | 78 | 68 | 64 | 60 | 55 | 52 | 49 | 47 | 45 | 36 | 25 | 13 | 8 | 2 | 0 |
| 91  | 68  | 51  | 46  | 36 | 32 | 22 | 18 | 16 | 15 | 12 | 9  | 8  | 5  | 4  | 3  | 0  | 0 | 0 | 0 |

# Supplemental Figure 3 – Kaplan-Meier plots of progression-free survival by mutation for patients harboring *PIK3CA* mutant vs wild-type tumors

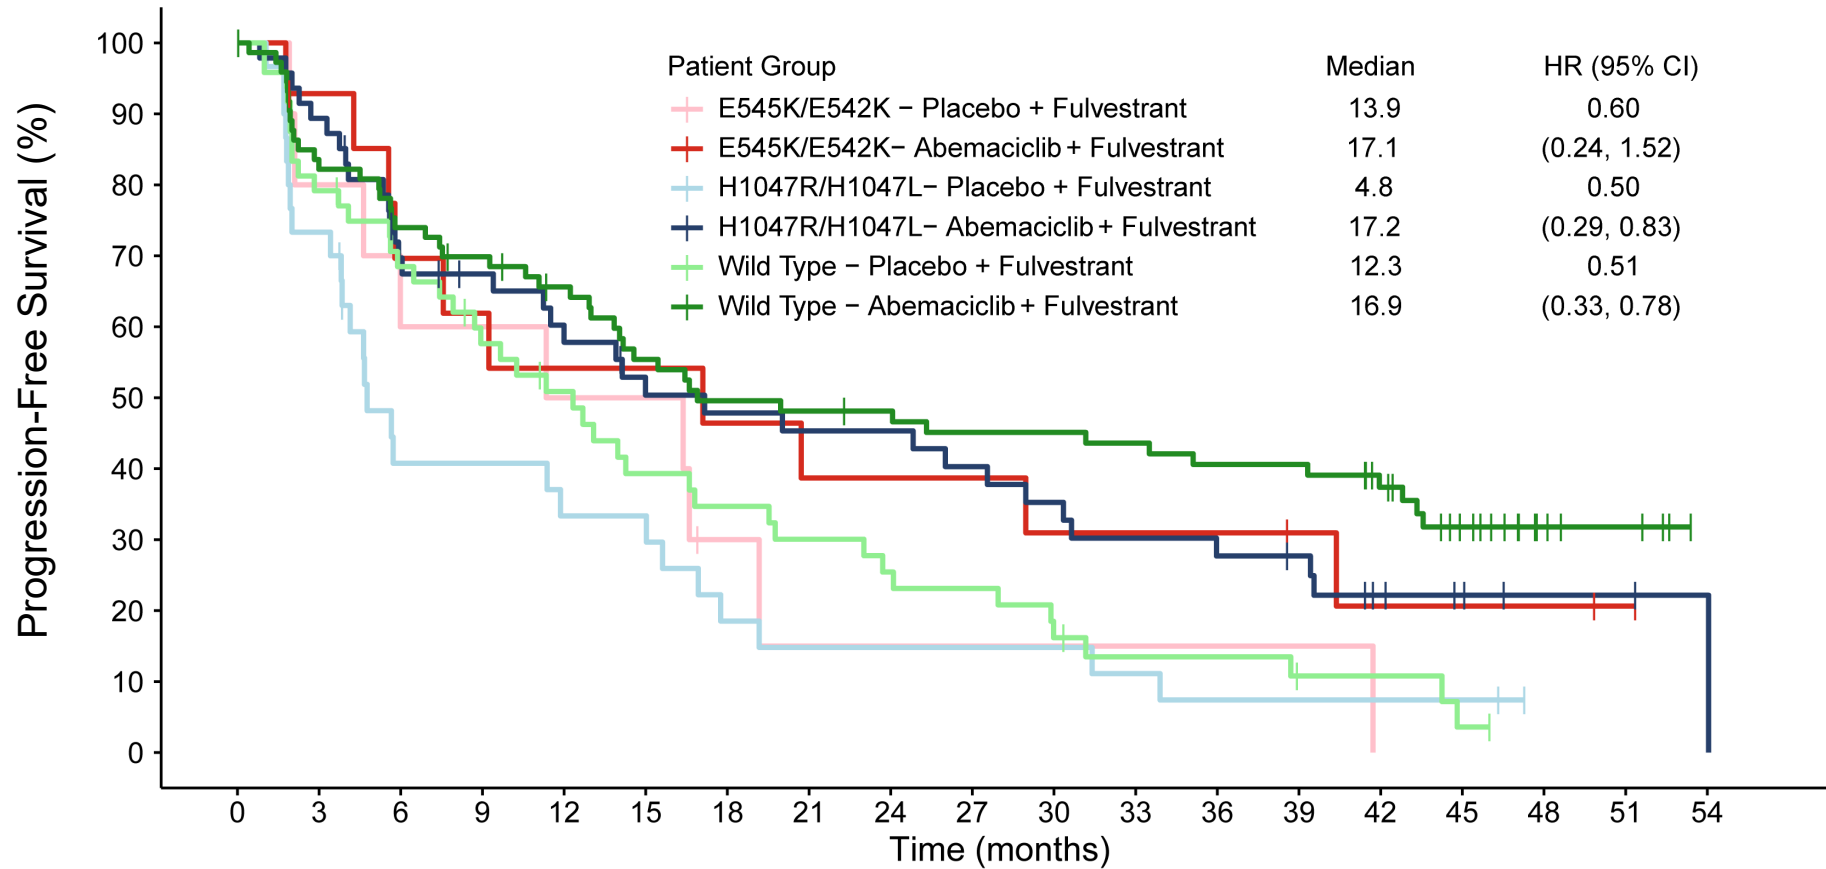

| Number at risk |    | 0  | 3  | 6  | 9  | 12 | 15 | 18 | 21 | 24 | 27 | 30 | 33 | 36 | 39 | 42 | 45 | 48 | 51 | 54 |
|----------------|----|----|----|----|----|----|----|----|----|----|----|----|----|----|----|----|----|----|----|----|
| —              | 10 | 8  | 6  | 6  | 5  | 5  | 2  | 1  | 1  | 1  | 1  | 1  | 1  | 1  | 1  | 0  | 0  | 0  | 0  | 0  |
| —              | 14 | 12 | 9  | 8  | 7  | 7  | 6  | 5  | 5  | 5  | 4  | 4  | 4  | 4  | 3  | 2  | 2  | 2  | 1  | 0  |
| —              | 30 | 22 | 11 | 11 | 9  | 9  | 5  | 4  | 4  | 4  | 4  | 4  | 3  | 2  | 2  | 2  | 2  | 0  | 0  | 0  |
| —              | 50 | 42 | 31 | 28 | 25 | 20 | 19 | 18 | 18 | 16 | 14 | 12 | 11 | 11 | 10 | 6  | 4  | 2  | 2  | 1  |
| —              | 48 | 38 | 32 | 26 | 22 | 17 | 15 | 13 | 11 | 10 | 7  | 5  | 5  | 3  | 3  | 3  | 1  | 0  | 0  | 0  |
| —              | 75 | 60 | 54 | 50 | 45 | 38 | 34 | 33 | 32 | 30 | 30 | 29 | 27 | 27 | 22 | 14 | 6  | 4  | 0  | 0  |

**Note: Hazard Ratio were calculated between the treatment and placebo arm.  
8 patients belong to both E545K/E542K and H1047R/H1047L groups**

# Supplemental Figure 4 – Kaplan-Meier plots of progression-free survival by mutation for patients harboring *ESR1* mutant vs wild-type tumors

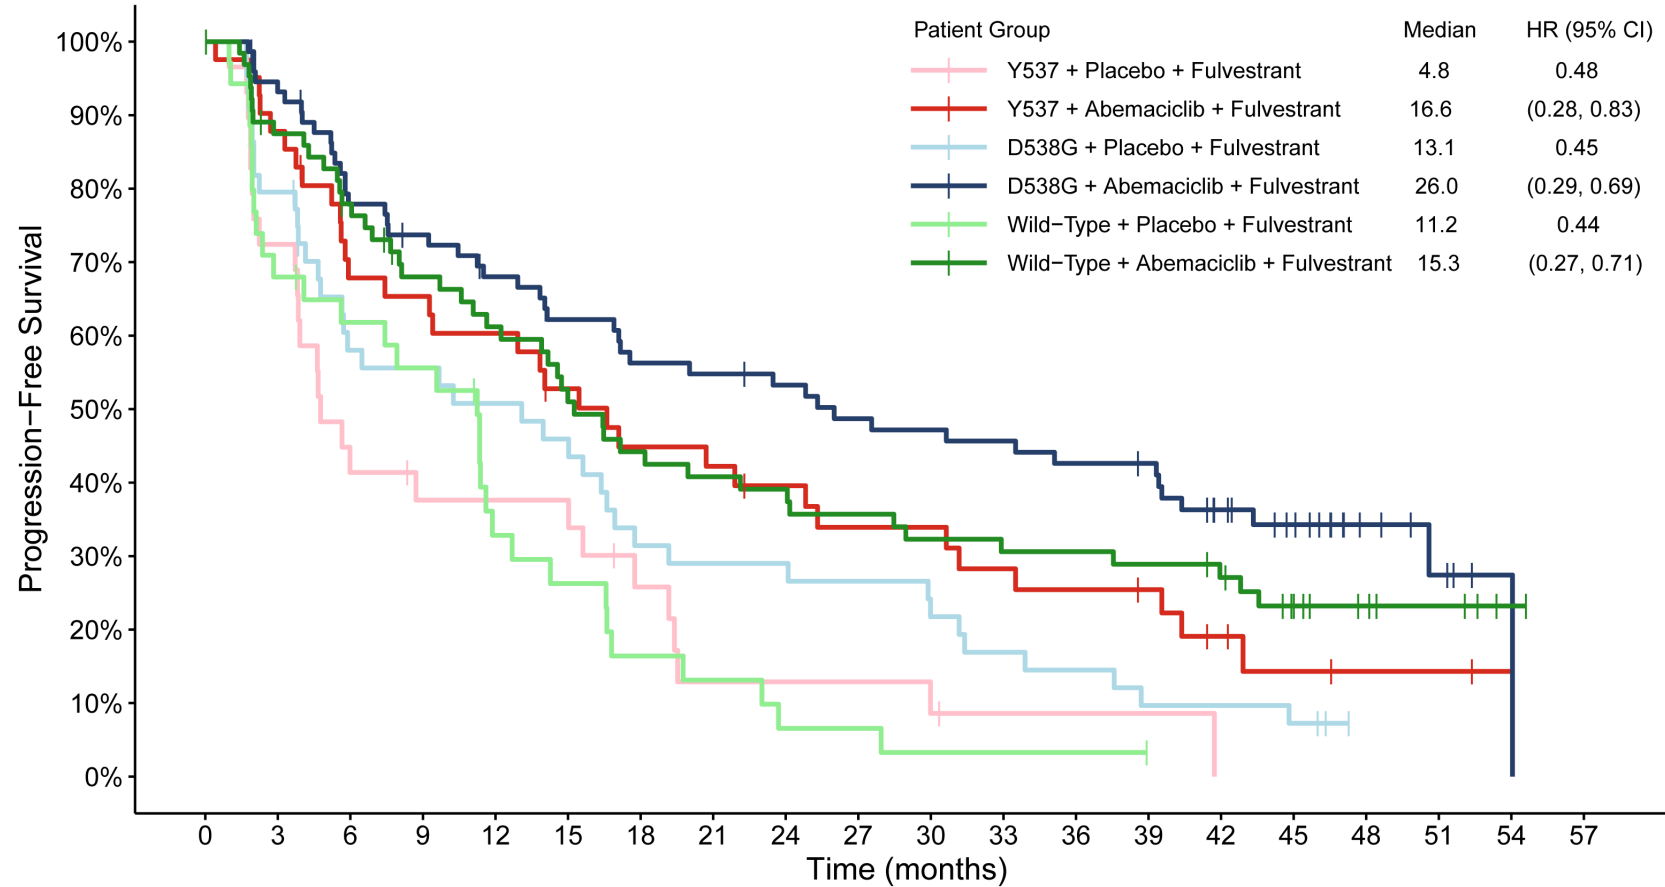

| Number at risk                        |    | 0  | 3  | 6  | 9  | 12 | 15 | 18 | 21 | 24 | 27 | 30 | 33 | 36 | 39 | 42 | 45 | 48 | 51 | 54 | 57 |
|---------------------------------------|----|----|----|----|----|----|----|----|----|----|----|----|----|----|----|----|----|----|----|----|----|
| Y537 + Placebo + Fulvestrant          | 29 | 21 | 12 | 10 | 10 | 10 | 6  | 3  | 3  | 3  | 2  | 1  | 1  | 1  | 0  | 0  | 0  | 0  | 0  | 0  | 0  |
| Y537 + Abemaciclib + Fulvestrant      | 42 | 36 | 27 | 26 | 24 | 20 | 17 | 16 | 14 | 12 | 12 | 10 | 9  | 8  | 5  | 3  | 2  | 2  | 2  | 1  | 0  |
| D538G + Placebo + Fulvestrant         | 44 | 35 | 24 | 23 | 21 | 19 | 13 | 12 | 12 | 11 | 9  | 7  | 6  | 4  | 3  | 0  | 0  | 0  | 0  | 0  | 0  |
| D538G + Abemaciclib + Fulvestrant     | 76 | 68 | 56 | 52 | 47 | 42 | 38 | 37 | 35 | 32 | 31 | 30 | 28 | 27 | 20 | 15 | 7  | 4  | 1  | 0  | 0  |
| Wild-Type + Placebo + Fulvestrant     | 35 | 23 | 20 | 18 | 10 | 8  | 5  | 4  | 2  | 2  | 1  | 1  | 1  | 0  | 0  | 0  | 0  | 0  | 0  | 0  | 0  |
| Wild-Type + Abemaciclib + Fulvestrant | 66 | 55 | 48 | 40 | 36 | 30 | 26 | 24 | 23 | 21 | 19 | 18 | 18 | 17 | 15 | 10 | 6  | 4  | 1  | 0  | 0  |

**Note: Hazard Ratio were calculated between the treatment and placebo arm.  
44 patients belong to both D538G and Y537 mutation groups**

# Supplemental Figure 5 - Kaplan-Meier plots of overall survival in the ITT vs. TR population

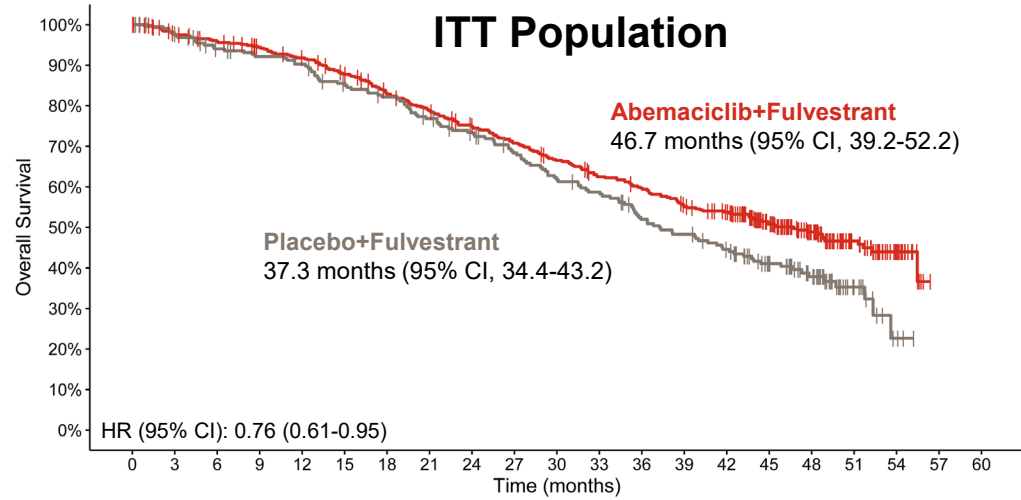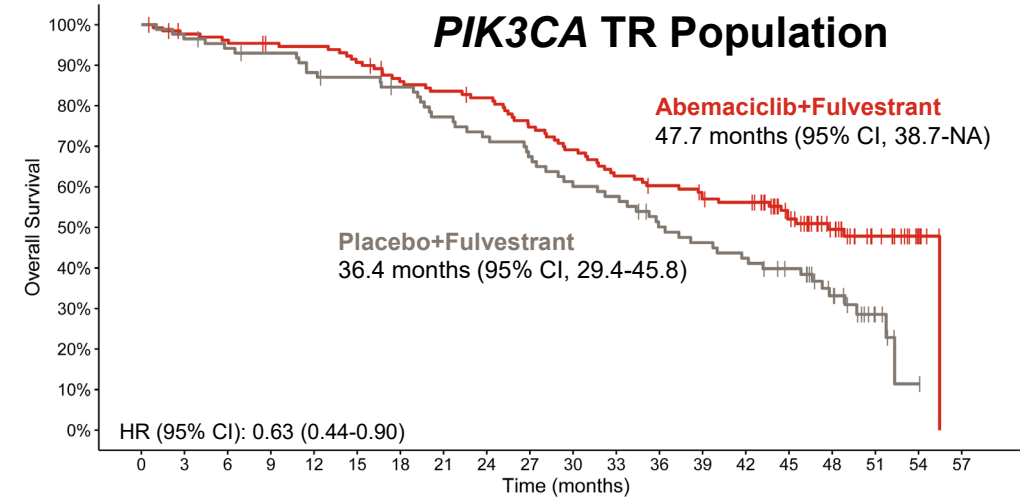

Number at risk

|   |     |     |     |     |     |     |     |     |     |     |     |     |     |     |     |     |     |    |    |   |   |
|---|-----|-----|-----|-----|-----|-----|-----|-----|-----|-----|-----|-----|-----|-----|-----|-----|-----|----|----|---|---|
| — | 446 | 422 | 410 | 397 | 384 | 364 | 339 | 321 | 302 | 284 | 265 | 246 | 234 | 214 | 202 | 157 | 101 | 58 | 23 | 0 | 0 |
| — | 223 | 214 | 201 | 195 | 191 | 178 | 170 | 158 | 148 | 135 | 122 | 115 | 99  | 92  | 82  | 62  | 42  | 15 | 3  | 0 | 0 |

Number at risk

|   |     |     |     |     |     |     |     |     |     |    |    |    |    |    |    |    |    |    |   |   |
|---|-----|-----|-----|-----|-----|-----|-----|-----|-----|----|----|----|----|----|----|----|----|----|---|---|
| — | 133 | 127 | 125 | 122 | 121 | 116 | 108 | 105 | 102 | 93 | 86 | 78 | 74 | 69 | 67 | 49 | 34 | 21 | 8 | 0 |
| — | 86  | 83  | 80  | 78  | 74  | 72  | 69  | 63  | 59  | 55 | 49 | 47 | 39 | 36 | 33 | 28 | 18 | 6  | 1 | 0 |

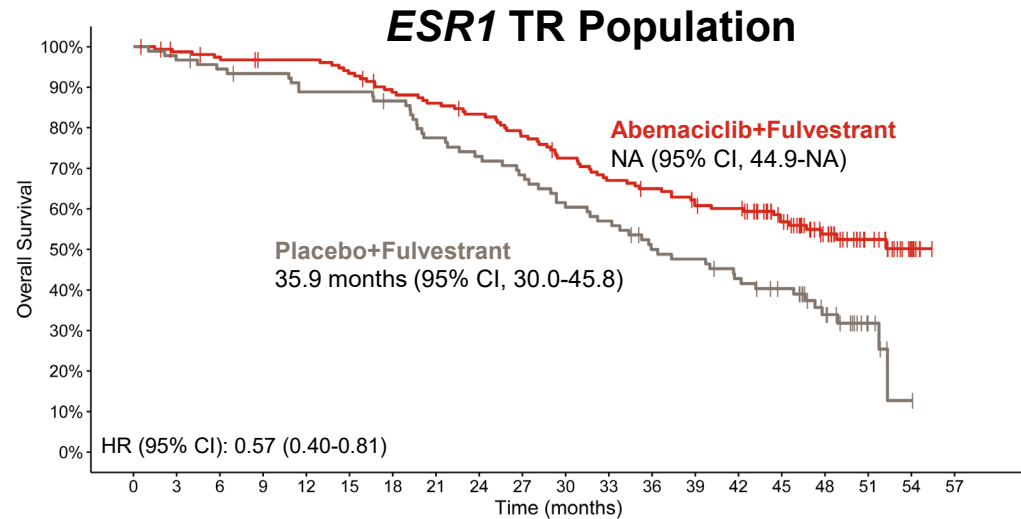

Number at risk

|   |     |     |     |     |     |     |     |     |     |     |     |    |    |    |    |    |    |    |   |   |
|---|-----|-----|-----|-----|-----|-----|-----|-----|-----|-----|-----|----|----|----|----|----|----|----|---|---|
| — | 157 | 152 | 149 | 146 | 146 | 141 | 132 | 128 | 123 | 115 | 106 | 98 | 94 | 87 | 85 | 66 | 46 | 30 | 9 | 0 |
| — | 91  | 88  | 85  | 83  | 79  | 79  | 76  | 68  | 64  | 60  | 53  | 50 | 42 | 40 | 35 | 30 | 19 | 6  | 1 | 0 |

# Supplemental Figure 6 – Kaplan-Meier plots of overall survival by mutation for patients harboring *PIK3CA* mutant vs wild-type tumors

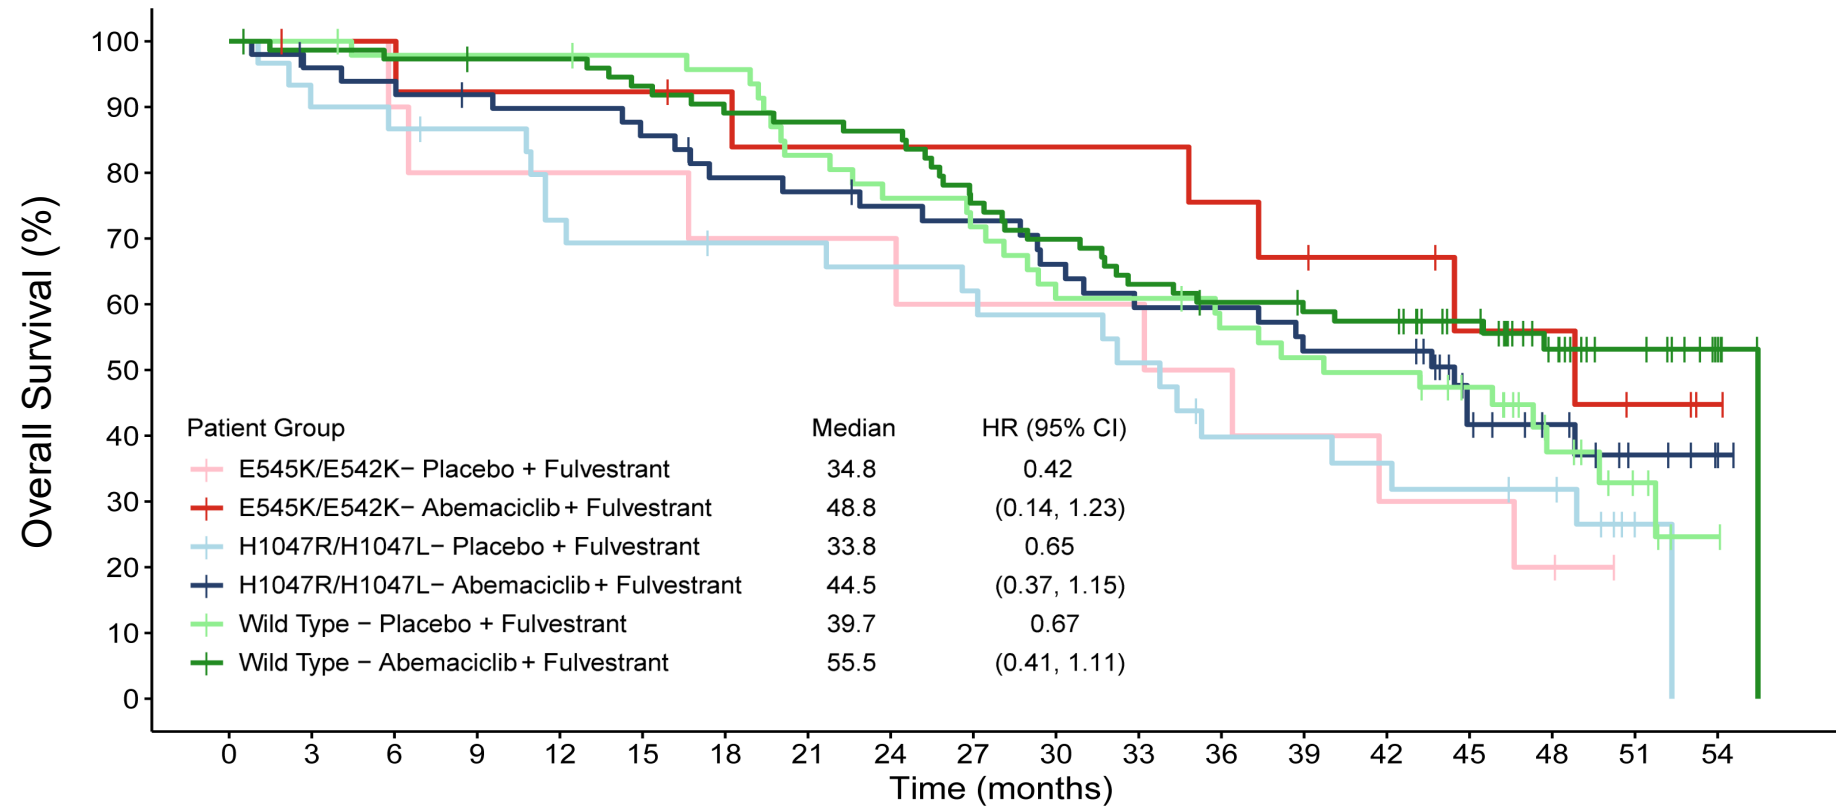

**Number at risk**

|    |    |    |    |    |    |    |    |    |    |    |    |    |    |    |    |    |    |   |
|----|----|----|----|----|----|----|----|----|----|----|----|----|----|----|----|----|----|---|
| 10 | 10 | 9  | 8  | 8  | 8  | 7  | 7  | 7  | 6  | 6  | 6  | 5  | 4  | 3  | 3  | 2  | 0  | 0 |
| 14 | 13 | 13 | 12 | 12 | 12 | 11 | 10 | 10 | 10 | 10 | 10 | 9  | 8  | 7  | 5  | 5  | 3  | 1 |
| 30 | 27 | 26 | 25 | 21 | 20 | 19 | 19 | 18 | 17 | 16 | 14 | 10 | 10 | 9  | 8  | 7  | 1  | 0 |
| 50 | 47 | 46 | 44 | 43 | 41 | 37 | 36 | 34 | 33 | 30 | 27 | 27 | 24 | 24 | 14 | 10 | 5  | 2 |
| 48 | 48 | 46 | 46 | 46 | 45 | 44 | 38 | 35 | 33 | 28 | 28 | 25 | 23 | 22 | 18 | 10 | 5  | 1 |
| 75 | 73 | 72 | 71 | 71 | 68 | 65 | 64 | 63 | 55 | 51 | 46 | 43 | 41 | 40 | 32 | 21 | 14 | 5 |

**Note: Hazard Ratio were calculated between the treatment and placebo arm. 8 patients belong to both E545K/E542K and H1047R/H1047L groups**

# Supplemental Figure 7 – Kaplan-Meier plots of overall survival by mutation for patients harboring *ESR1* mutant vs wild-type tumors

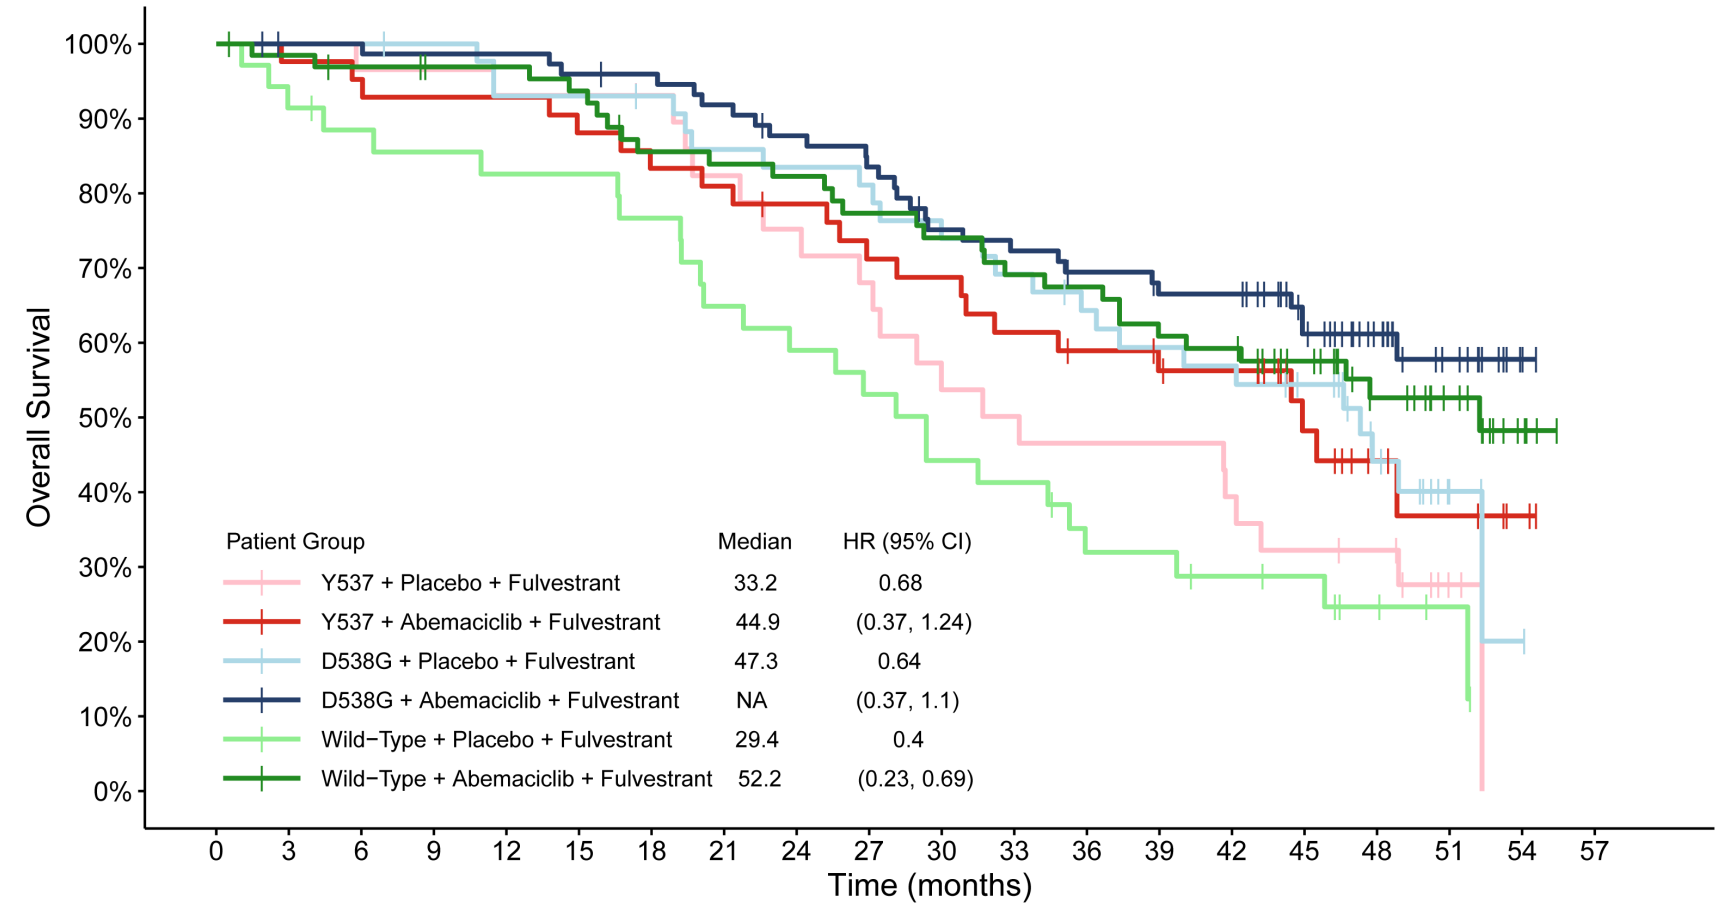

| Number at risk                        |    | 0  | 3  | 6  | 9  | 12 | 15 | 18 | 21 | 24 | 27 | 30 | 33 | 36 | 39 | 42 | 45 | 48 | 51 | 54 | 57 |
|---------------------------------------|----|----|----|----|----|----|----|----|----|----|----|----|----|----|----|----|----|----|----|----|----|
| Y537 + Placebo + Fulvestrant          | 29 | 29 | 28 | 28 | 27 | 27 | 26 | 23 | 21 | 19 | 15 | 14 | 13 | 13 | 11 | 9  | 8  | 2  | 0  | 0  | 0  |
| Y537 + Abemaciclib + Fulvestrant      | 42 | 41 | 40 | 39 | 39 | 37 | 35 | 34 | 32 | 29 | 28 | 25 | 23 | 21 | 20 | 12 | 7  | 5  | 2  | 0  | 0  |
| D538G + Placebo + Fulvestrant         | 44 | 44 | 44 | 43 | 40 | 40 | 39 | 36 | 35 | 34 | 31 | 29 | 26 | 24 | 23 | 20 | 12 | 3  | 1  | 0  | 0  |
| D538G + Abemaciclib + Fulvestrant     | 76 | 74 | 74 | 73 | 73 | 71 | 70 | 67 | 63 | 60 | 53 | 51 | 48 | 45 | 45 | 34 | 24 | 14 | 3  | 0  | 0  |
| Wild-Type + Placebo + Fulvestrant     | 35 | 32 | 30 | 29 | 28 | 28 | 26 | 22 | 20 | 18 | 15 | 14 | 10 | 10 | 8  | 7  | 4  | 2  | 0  | 0  | 0  |
| Wild-Type + Abemaciclib + Fulvestrant | 66 | 64 | 62 | 60 | 60 | 58 | 52 | 51 | 50 | 47 | 45 | 42 | 41 | 37 | 36 | 29 | 20 | 14 | 5  | 0  | 0  |

**Note: Hazard Ratio were calculated between the treatment and placebo arm. 44 patients belong to both D538G and Y537 mutation groups**



Supplemental Figure 8A: Kaplan-Meier plots of time-to-chemotherapy for patients with A) *PIK3CA*-wild-type or mutant tumors and B) *ESR1*-wild-type or mutant tumors

***PIK3CA* Wild-Type**

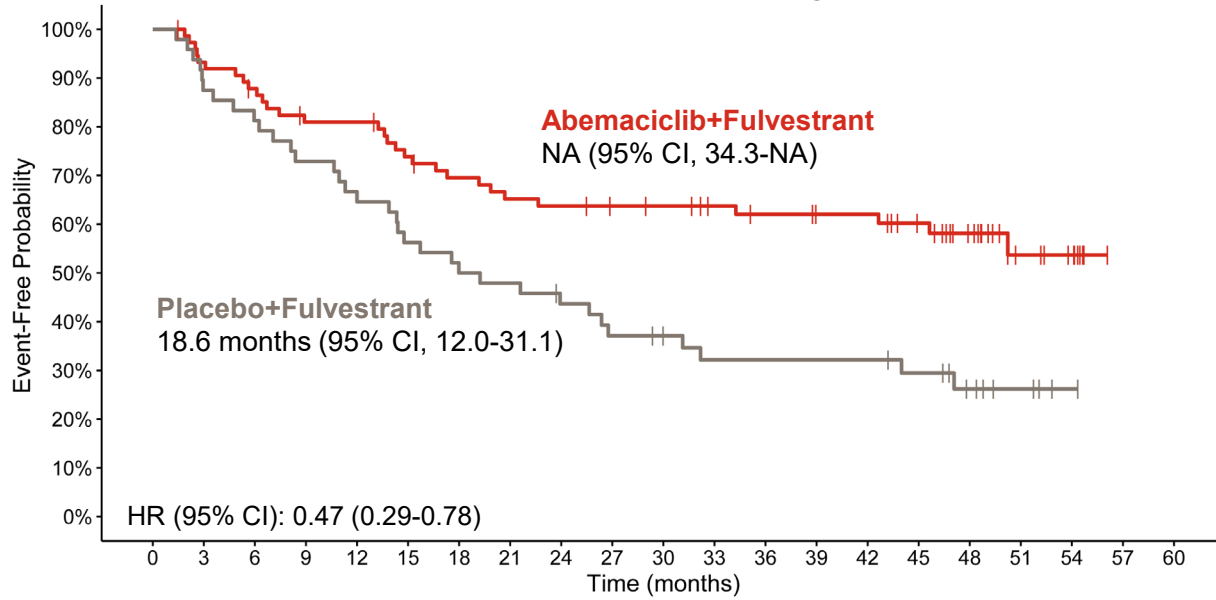

| Number at risk |                                                          |
|----------------|----------------------------------------------------------|
| 75             | 69 64 58 58 52 48 45 44 42 41 38 36 34 34 29 20 10 7 0 0 |
| 48             | 42 39 35 32 27 24 23 20 17 15 13 13 13 13 11 7 4 1 0 0   |

***PIK3CA* Mutant**

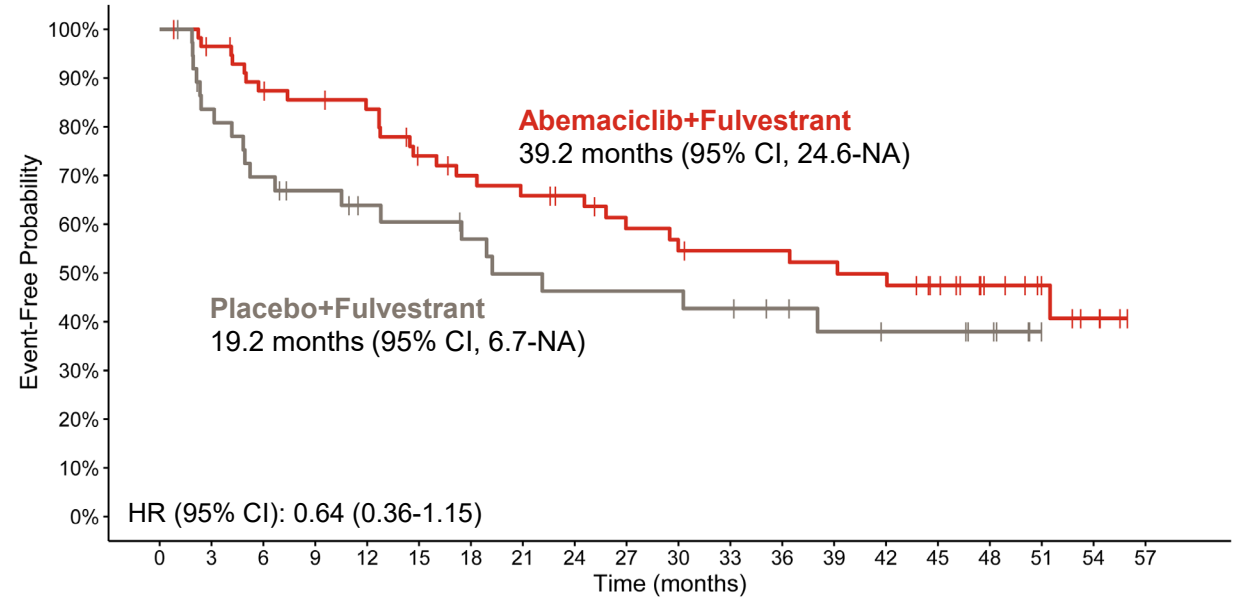

| Number at risk |                                                       |
|----------------|-------------------------------------------------------|
| 58             | 54 48 46 44 37 34 32 30 26 24 23 23 22 21 17 11 7 4 0 |
| 38             | 30 25 22 19 18 16 14 13 13 12 10 8 7 7 5 0 0 0        |

Supplemental Figure 8B: Kaplan-Meier plots of time-to-chemotherapy for patients with A) *PIK3CA*-wild-type or mutant tumors and B) *ESR1*-wild-type or mutant tumors

***ESR1* Wild-Type**

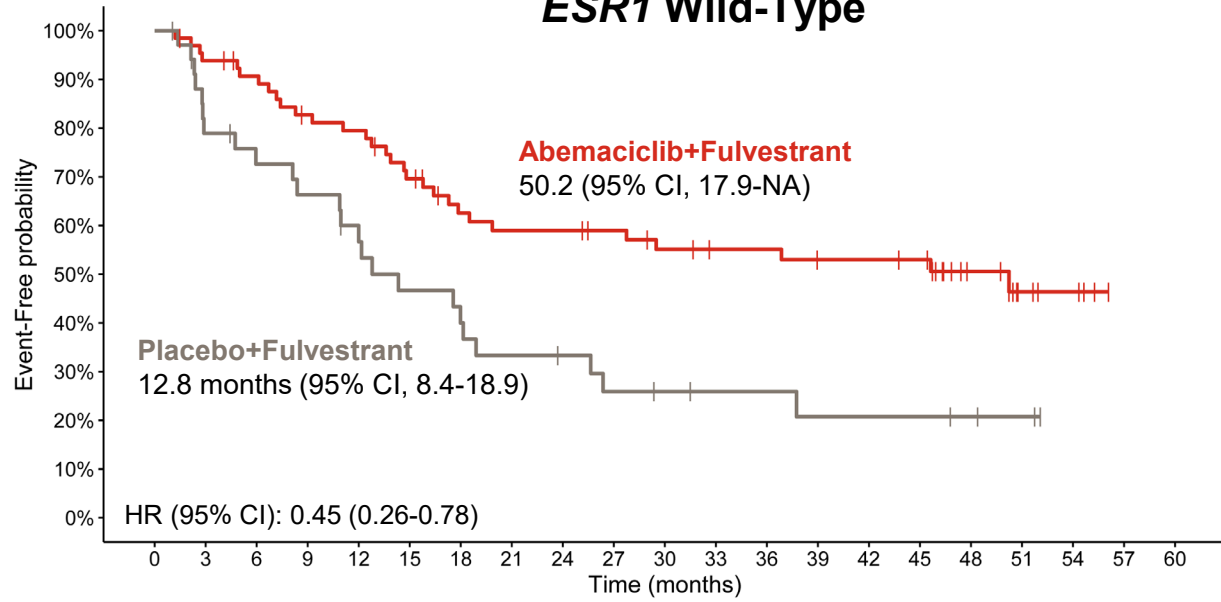

Number at risk

|    |    |    |    |    |    |    |    |    |    |    |    |    |    |    |    |    |   |   |   |   |
|----|----|----|----|----|----|----|----|----|----|----|----|----|----|----|----|----|---|---|---|---|
| 66 | 61 | 57 | 51 | 49 | 42 | 35 | 33 | 33 | 31 | 28 | 26 | 26 | 24 | 24 | 23 | 13 | 7 | 5 | 0 | 0 |
| 35 | 26 | 23 | 21 | 18 | 14 | 12 | 10 | 9  | 7  | 6  | 5  | 5  | 4  | 4  | 4  | 3  | 2 | 0 | 0 | 0 |

***ESR1* Mutant**

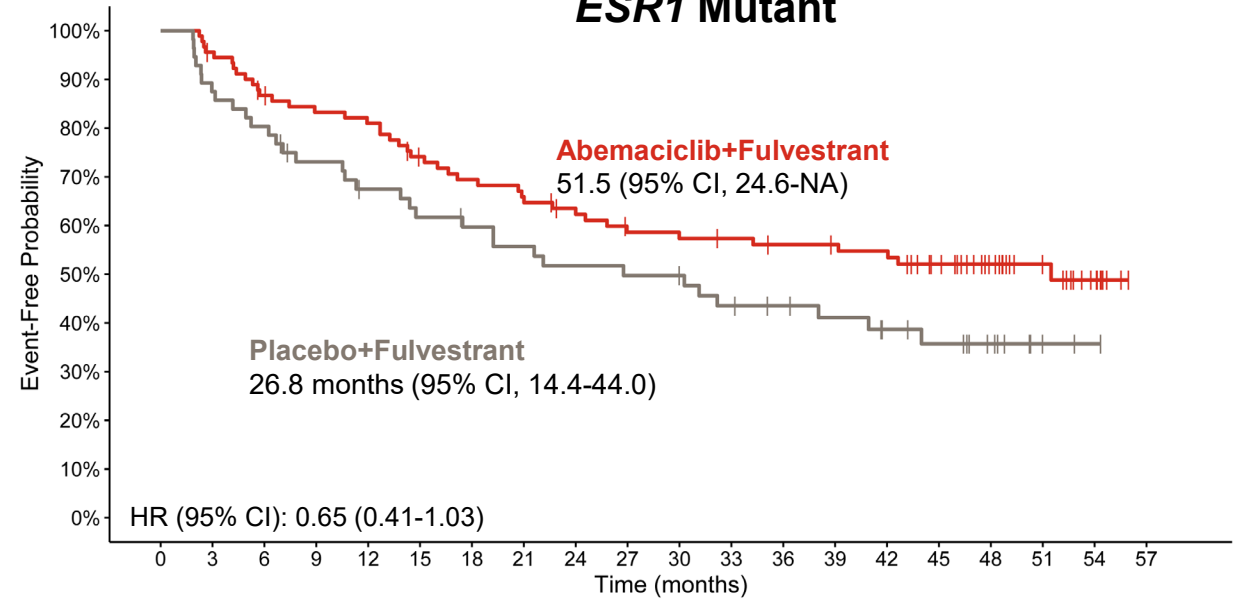

Number at risk

|    |    |    |    |    |    |    |    |    |    |    |    |    |    |    |    |    |    |   |   |
|----|----|----|----|----|----|----|----|----|----|----|----|----|----|----|----|----|----|---|---|
| 91 | 86 | 77 | 73 | 71 | 63 | 59 | 56 | 52 | 47 | 46 | 45 | 43 | 42 | 41 | 34 | 25 | 16 | 9 | 0 |
| 56 | 49 | 45 | 39 | 35 | 32 | 30 | 28 | 26 | 25 | 24 | 21 | 19 | 17 | 14 | 12 | 8  | 2  | 1 | 0 |

Supplemental Figure 9A: Kaplan-Meier plots of chemotherapy-free survival for patients with A) *PIK3CA*-wild-type or mutant tumors and B) *ESR1*-wild-type or mutant tumors

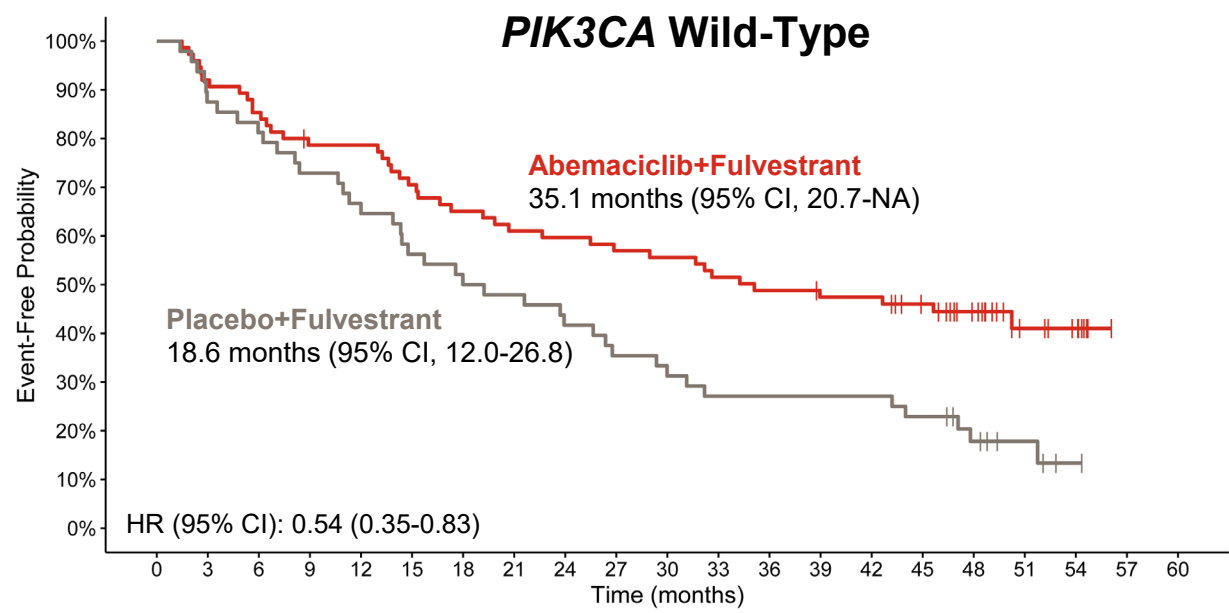

Number at risk

|    |    |    |    |    |    |    |    |    |    |    |    |    |    |    |    |    |    |   |   |   |
|----|----|----|----|----|----|----|----|----|----|----|----|----|----|----|----|----|----|---|---|---|
| 75 | 69 | 64 | 58 | 58 | 52 | 48 | 45 | 44 | 42 | 41 | 38 | 36 | 34 | 34 | 29 | 20 | 10 | 7 | 0 | 0 |
| 48 | 42 | 39 | 35 | 32 | 27 | 24 | 23 | 20 | 17 | 15 | 13 | 13 | 13 | 13 | 11 | 7  | 4  | 1 | 0 | 0 |

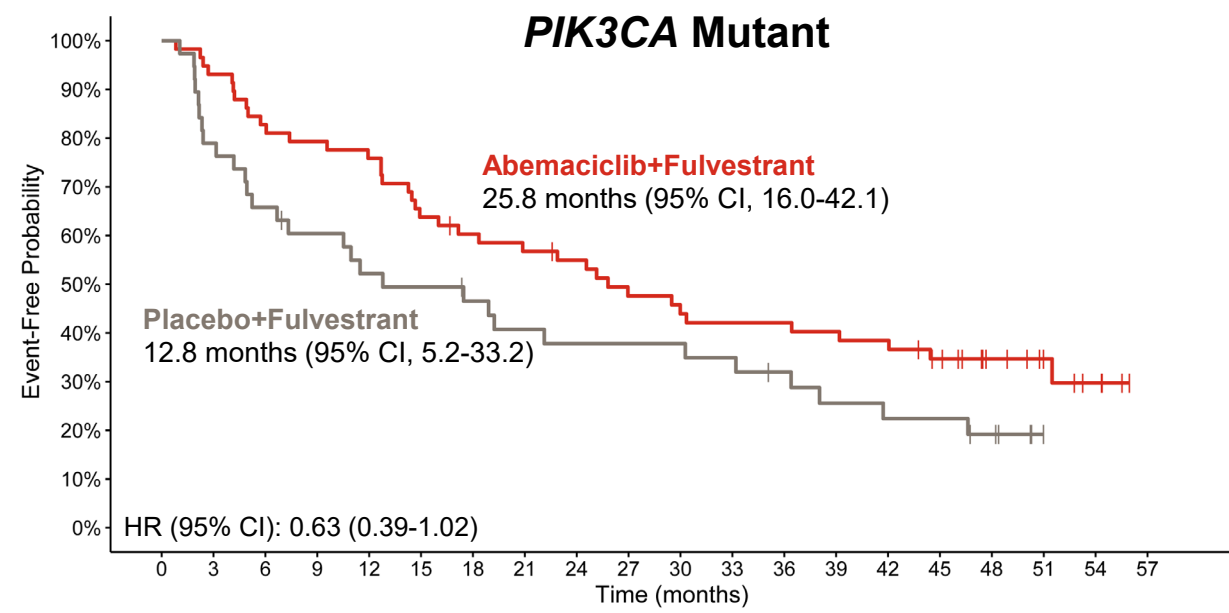

Number at risk

|    |    |    |    |    |    |    |    |    |    |    |    |    |    |    |    |    |   |   |   |
|----|----|----|----|----|----|----|----|----|----|----|----|----|----|----|----|----|---|---|---|
| 58 | 54 | 48 | 46 | 44 | 37 | 34 | 32 | 30 | 26 | 24 | 23 | 23 | 22 | 21 | 17 | 11 | 7 | 4 | 0 |
| 38 | 30 | 25 | 22 | 19 | 18 | 16 | 14 | 13 | 13 | 13 | 12 | 10 | 8  | 7  | 7  | 5  | 0 | 0 | 0 |

Supplemental Figure 9B: Kaplan-Meier plots of chemotherapy-free survival for patients with A) *PIK3CA*-wild-type or mutant tumors and B) *ESR1*-wild-type or mutant tumors

***ESR1* Wild-Type**

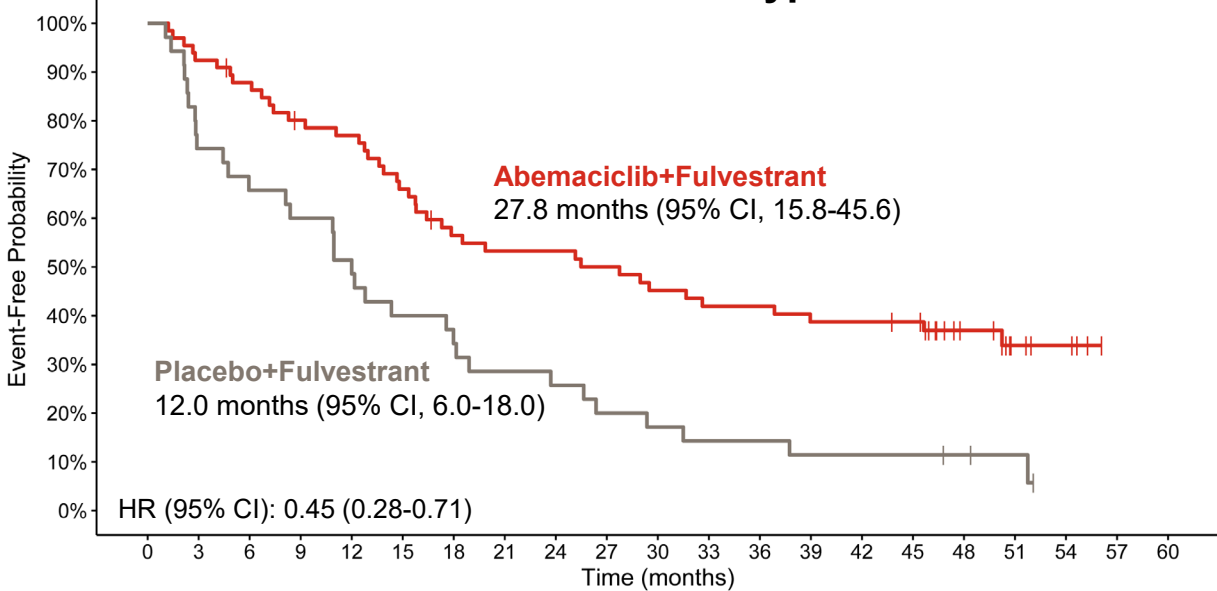

Number at risk

|    |    |    |    |    |    |    |    |    |    |    |    |    |    |    |    |    |   |   |   |   |
|----|----|----|----|----|----|----|----|----|----|----|----|----|----|----|----|----|---|---|---|---|
| 66 | 61 | 57 | 51 | 49 | 42 | 35 | 33 | 33 | 31 | 28 | 26 | 26 | 24 | 24 | 23 | 13 | 7 | 5 | 0 | 0 |
| 35 | 26 | 23 | 21 | 18 | 14 | 12 | 10 | 9  | 7  | 6  | 5  | 5  | 4  | 4  | 4  | 3  | 2 | 0 | 0 | 0 |

***ESR1* Mutant**

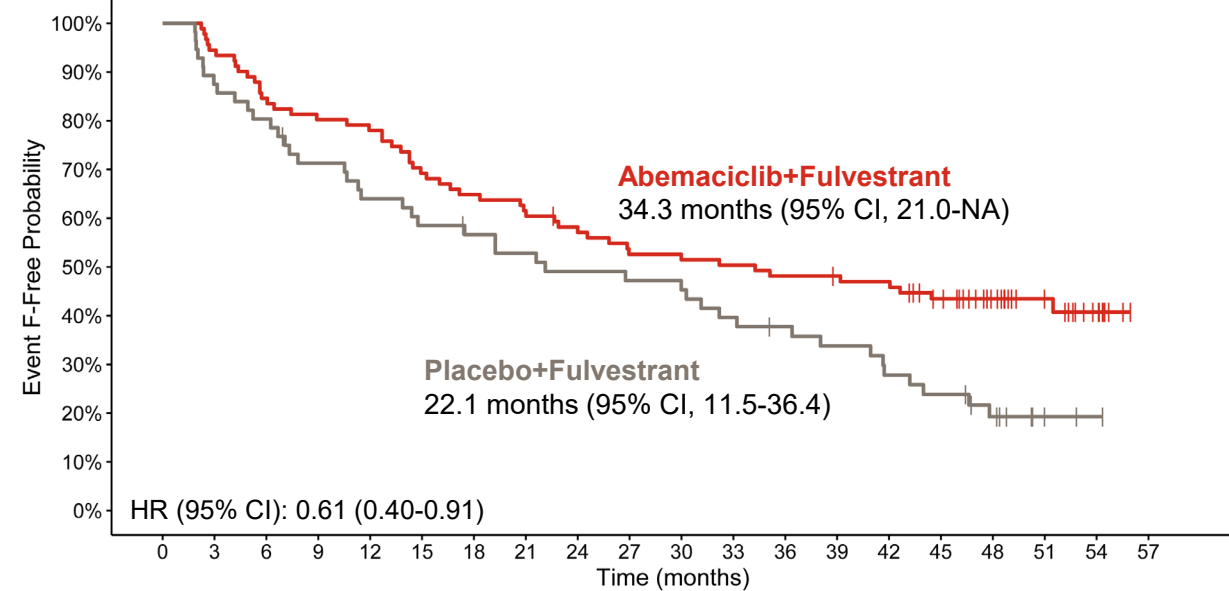

Number at risk

|    |    |    |    |    |    |    |    |    |    |    |    |    |    |    |    |    |    |   |   |
|----|----|----|----|----|----|----|----|----|----|----|----|----|----|----|----|----|----|---|---|
| 91 | 86 | 77 | 73 | 71 | 63 | 59 | 56 | 52 | 47 | 46 | 45 | 43 | 42 | 41 | 34 | 25 | 16 | 9 | 0 |
| 56 | 49 | 45 | 39 | 35 | 32 | 30 | 28 | 26 | 25 | 24 | 21 | 19 | 17 | 14 | 12 | 8  | 2  | 1 | 0 |

Supplemental Figure 10A: Kaplan-Meier plots of time to second disease progression for patients with A) *PIK3CA*-wild-type or mutant tumors and B) *ESR1*-wild-type or mutant tumors

***PIK3CA* Wild-Type**

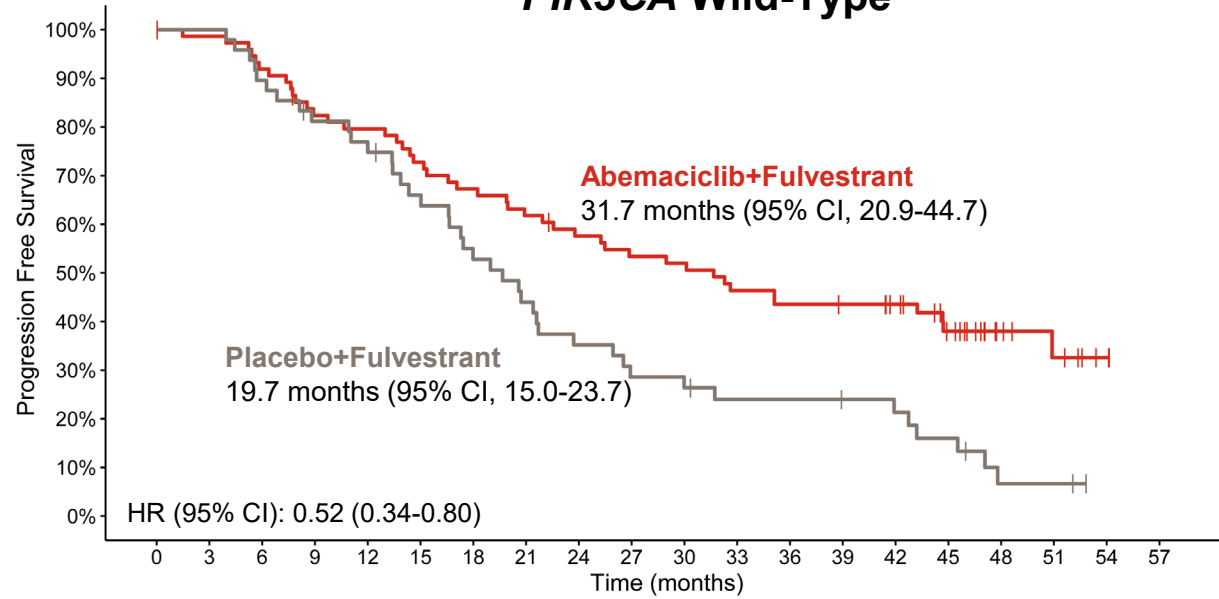

Number at risk

|    |    |    |    |    |    |    |    |    |    |    |    |    |    |    |    |   |   |   |   |
|----|----|----|----|----|----|----|----|----|----|----|----|----|----|----|----|---|---|---|---|
| 75 | 73 | 68 | 60 | 58 | 53 | 49 | 45 | 41 | 38 | 37 | 33 | 31 | 30 | 27 | 19 | 9 | 6 | 2 | 0 |
| 48 | 48 | 43 | 38 | 36 | 30 | 24 | 20 | 16 | 13 | 12 | 10 | 10 | 9  | 8  | 6  | 2 | 2 | 0 | 0 |

***PIK3CA* Mutant**

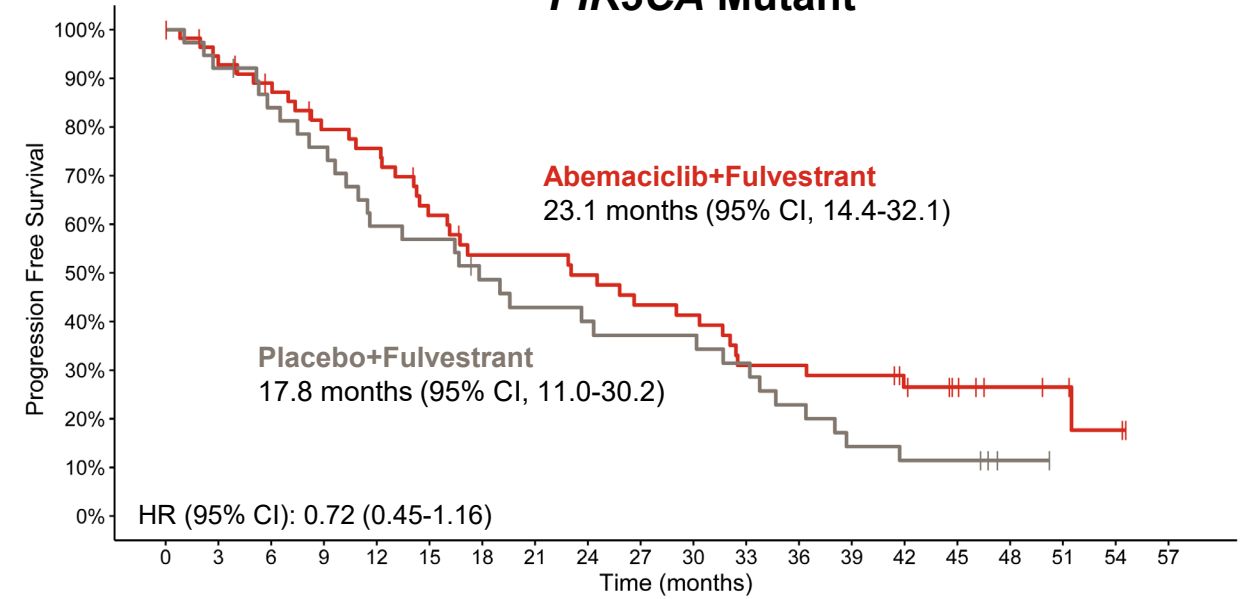

Number at risk

|    |    |    |    |    |    |    |    |    |    |    |    |    |    |    |   |   |   |   |   |
|----|----|----|----|----|----|----|----|----|----|----|----|----|----|----|---|---|---|---|---|
| 58 | 51 | 47 | 41 | 39 | 31 | 26 | 26 | 24 | 21 | 20 | 15 | 15 | 14 | 11 | 8 | 5 | 4 | 2 | 0 |
| 38 | 35 | 31 | 28 | 22 | 21 | 17 | 15 | 14 | 13 | 13 | 11 | 8  | 5  | 4  | 4 | 1 | 0 | 0 | 0 |

Supplemental Figure 10B: Kaplan-Meier plots of time to second disease progression for patients with A) *PIK3CA*-wild-type or mutant tumors and B) *ESR1*-wild-type or mutant tumors

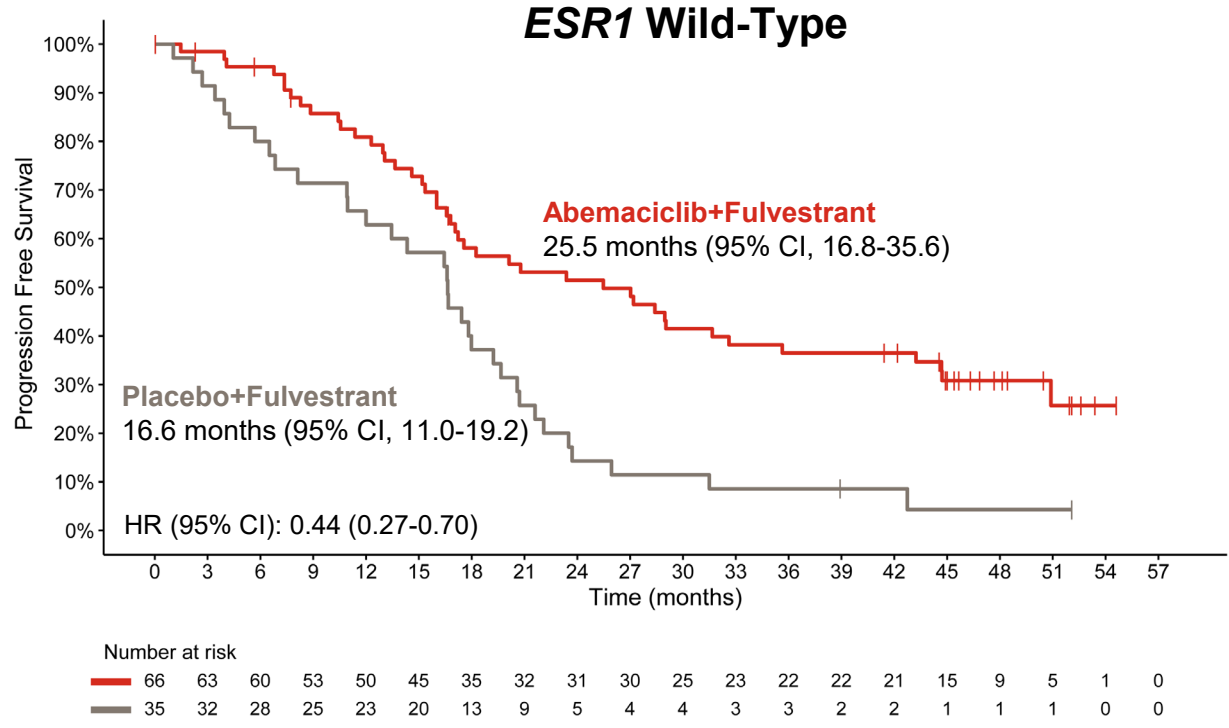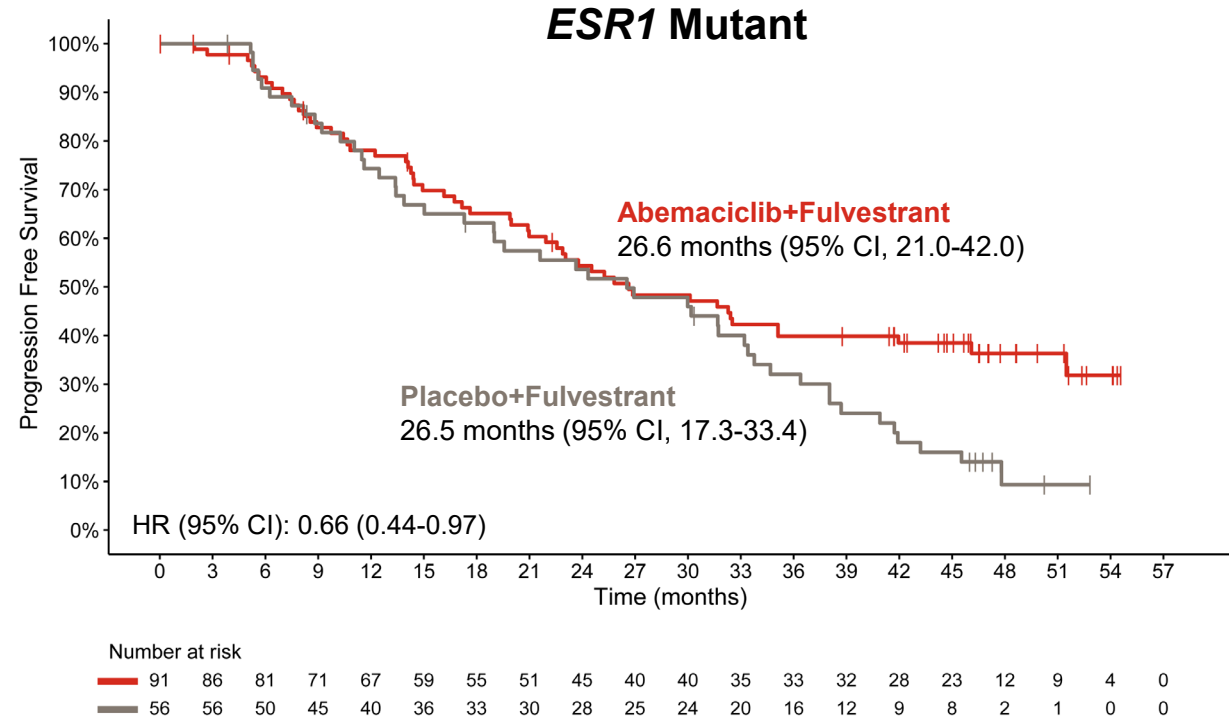

# Supplemental Table 1 – Table describing frequency of *PIK3CA* and *ESR1* mutations in plasma samples

| <i>PIK3CA</i> Mutations | Positive | Negative | Frequency |
|-------------------------|----------|----------|-----------|
| Overall                 | 96       | 123      | 43.8%     |
| H1047R                  | 78       | 156      | 33.3%     |
| E545K                   | 14       | 215      | 6.1%      |
| E542K                   | 10       | 224      | 4.3%      |
| H1047L                  | 3        | 216      | 1.4%      |
| <i>ESR1</i> Mutations   | Positive | Negative | Frequency |
| Overall                 | 147      | 101      | 59.3%     |
| D538G                   | 120      | 146      | 45.1%     |
| Y537C                   | 42       | 223      | 15.8%     |
| Y537S                   | 21       | 247      | 7.8%      |
| Y537N                   | 20       | 246      | 7.5%      |

Note: Frequency = positive/(positive + negative) X 100; 8/219 (3.7%) patients had both H1047R/L and E545K/E542K mutations, 44/248 (17.7%) patients had both D538G and Y537C/S/N mutations

# Supplemental Table 2 – Post-discontinuation therapy following second disease progression for patient with *PIK3CA*-wild-type or mutant tumors

| <b>Post-discontinuation therapy</b> | <b><i>PIK3CA</i> Wild-Type, PL (N=48)</b> | <b><i>PIK3CA</i> Wild-Type, Abema (N=75)</b> | <b><i>PIK3CA</i> Mutant, PL (N=38)</b> | <b><i>PIK3CA</i> Mutant, Abema (N=58)</b> |
|-------------------------------------|-------------------------------------------|----------------------------------------------|----------------------------------------|-------------------------------------------|
| Overall, n (%)                      | 48 (100)                                  | 75 (100)                                     | 38 (100)                               | 58 (100)                                  |
| Chemotherapy, n (%)                 | 17 (35.4)                                 | 19 (25.3)                                    | 15 (39.5)                              | 15 (25.9)                                 |
| Endocrine therapy, n (%)            | 13 (27.1)                                 | 15 (20.0)                                    | 6 (15.8)                               | 14 (24.1)                                 |
| Everolimus, n(%)                    | 4 (8.3)                                   | 9 (12.0)                                     | 4 (10.5)                               | 6 (10.3)                                  |
| Other, n(%)                         | 14 (29.2)                                 | 32 (42.7)                                    | 13 (34.2)                              | 23 (39.7)                                 |
| CDK4 & 6 inhibitor n(%)             | 7 (14.6)                                  | 3 (4.0)                                      | 3 (7.9)                                | 3 (5.2)                                   |
| non-CDK4 & 6 inhibitor, n (%)       | 7 (14.6)                                  | 29 (38.7)                                    | 10 (26.3)                              | 20 (34.5)                                 |



# Supplemental Table 3 – Post-discontinuation therapy following second disease progression for patient with *ESR1*-wild-type or mutant tumors

| <b>Post-discontinuation therapy</b> | <b><i>ESR1</i> Wild-Type, PL<br/>(N=35)</b> | <b><i>ESR1</i> Wild-Type, Abema<br/>(N=66)</b> | <b><i>ESR1</i> Mutant, PL<br/>(N=56)</b> | <b><i>ESR1</i> Mutant, Abema<br/>(N=91)</b> |
|-------------------------------------|---------------------------------------------|------------------------------------------------|------------------------------------------|---------------------------------------------|
| Overall, n (%)                      | 35 (100)                                    | 66 (100)                                       | 56 (100)                                 | 91 (100)                                    |
| Chemotherapy, n (%)                 | 15 (42.9)                                   | 19 (28.8)                                      | 20 (35.7)                                | 25 (27.5)                                   |
| Endocrine therapy, n (%)            | 10 (28.6)                                   | 15 (22.7)                                      | 11 (19.6)                                | 18 (19.8)                                   |
| Everolimus, n(%)                    | 1 (2.9)                                     | 8 (12.1)                                       | 8 (14.3)                                 | 11 (12.1)                                   |
| Other, n(%)                         | 9 (25.7)                                    | 24 (36.4)                                      | 17 (30.4)                                | 37 (40.7)                                   |
| CDK4 & 6 inhibitor n(%)             | 3 (8.6)                                     | 2 (3.0)                                        | 6 (10.7)                                 | 3 (4.4)                                     |
| non-CDK4 & 6 inhibitor, n (%)       | 6 (17.1)                                    | 22 (33.3)                                      | 11 (19.6)                                | 33 (36.3)                                   |
